# Supplementary material for: Universal nanosonosensitizer for ROS-mediated reduction of various cancer cells
Source: Royal Society of Chemistry journal article supplement (doi:10.1039/d3tb00159h), 2023-01-01
Supplement: d3tb00159h1.pdf [file d3tb00159h1.pdf]

## **Universal Nanosensitizer for ROS-Mediated reduction of various Cancer cells**

Junna Jiao<sup>1,3</sup>, Kun Shao<sup>4</sup>, Kaixin Wang<sup>1,3</sup>, Jiakuan Liu<sup>1,3</sup>, Zhijie Weng<sup>1,3</sup>,  
Junrong Jiao<sup>5\*</sup>, Zhuangwei Lv<sup>2,3\*</sup>

1 School of Basic Medical Sciences, Xinxiang Medical University, Xinxiang, Henan, 453003,  
People's Republic of China

2 School of Forensic Medicine, Xinxiang Medical University, Xinxiang, Henan, 453003,  
People's Republic of China

3 Xinxiang Key Laboratory of Tumor Vaccine and Immunotherapy, School of Basic Medical  
Sciences, Xinxiang Medical University, Xinxiang, Henan 453003, People's Republic of China

4 Department of Pathology, Xinxiang Central Hospital, Henan Province, Xinxiang, Henan  
453000, People's Republic of China

5 Key Lab for Special Functional Materials of Ministry of Education, School of Materials  
Science and Engineering; Henan University, Kaifeng 475004, People's Republic of China

\* Correspondence: Zhuangwei Lv, School of Forensic Medicine, Xinxiang Medical University,  
Xinxiang, Henan, 453003, People's Republic of China. Email: [201079@xxmu.edu.cn](mailto:201079@xxmu.edu.cn)

Junrong Jiao, Key Lab for Special Functional Materials of Ministry of Education, School of  
Materials Science and Engineering; Henan University, Kaifeng 475004, People's Republic of  
China. Email: [jiaojr@vip.henu.edu.cn](mailto:jiaojr@vip.henu.edu.cn)

## Supplementary Figures

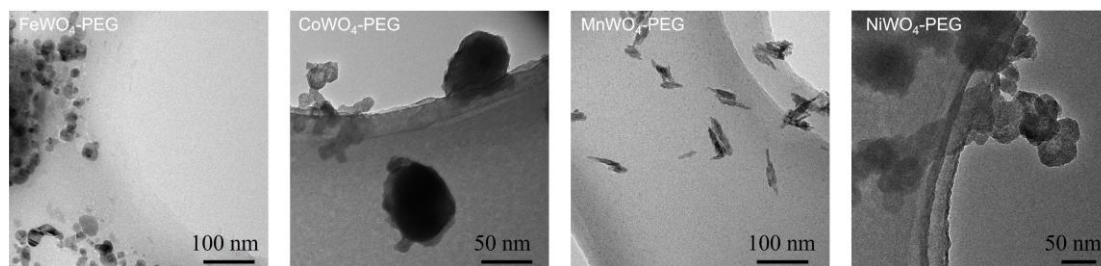

**Figure S1** The TEM images of MWO<sub>4</sub>-PEG (M= Mn Co Ni Fe) nanoparticles.

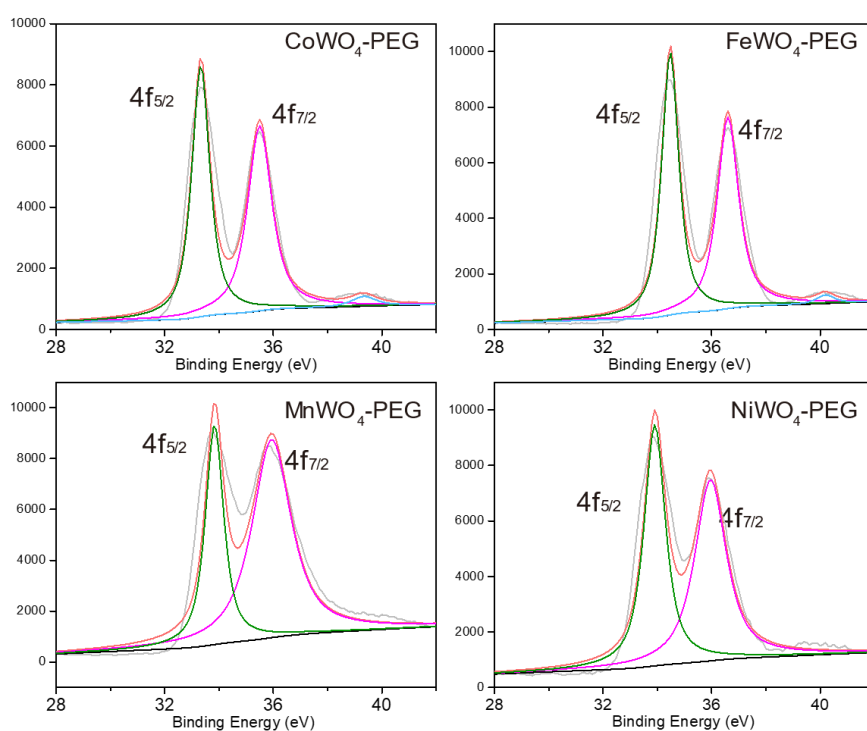

**Figure S2** The XPS spectra of W 4f (K) peaks of MWO<sub>4</sub>-PEG (M= Mn Co Ni Fe) nanoparticles.

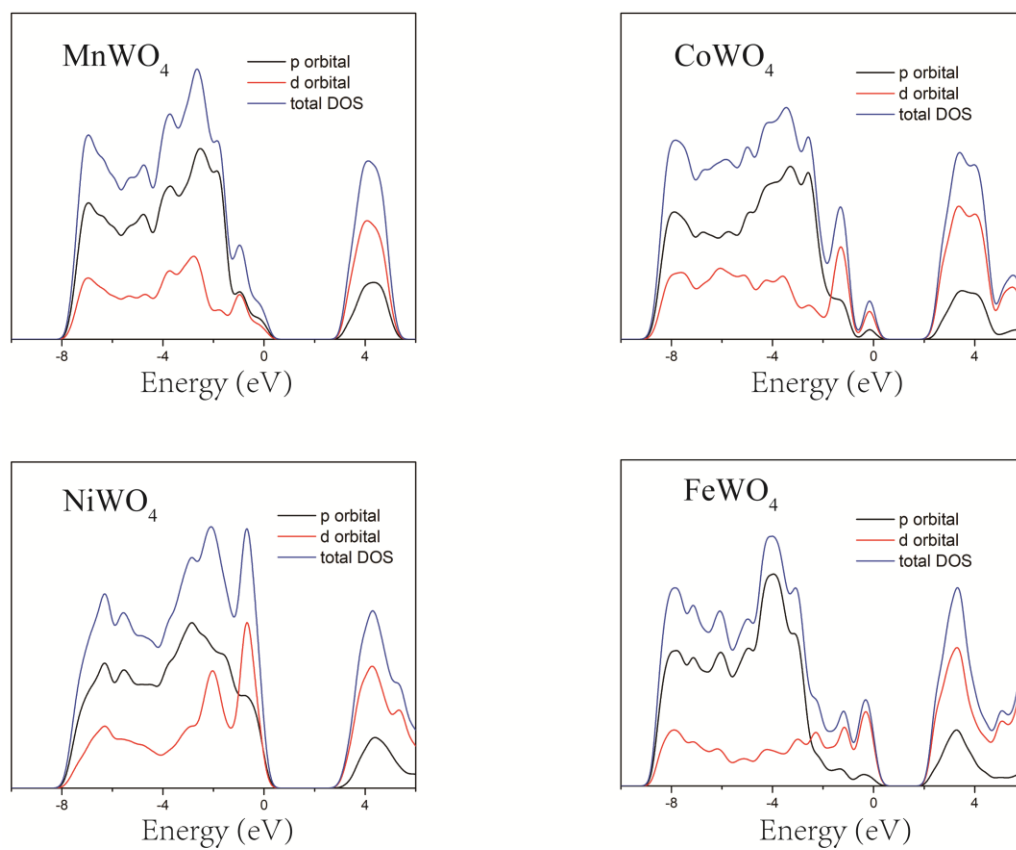

**Figure S3** The total and partial density of states of MWO<sub>4</sub> (M= Mn Co Ni Fe) nanoparticles.

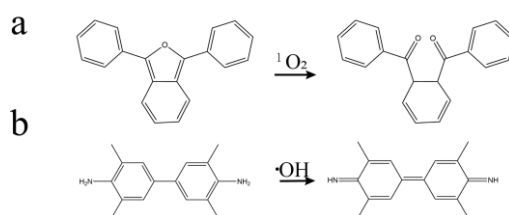

**Figure S4** the reactions of DPBF and TMB.



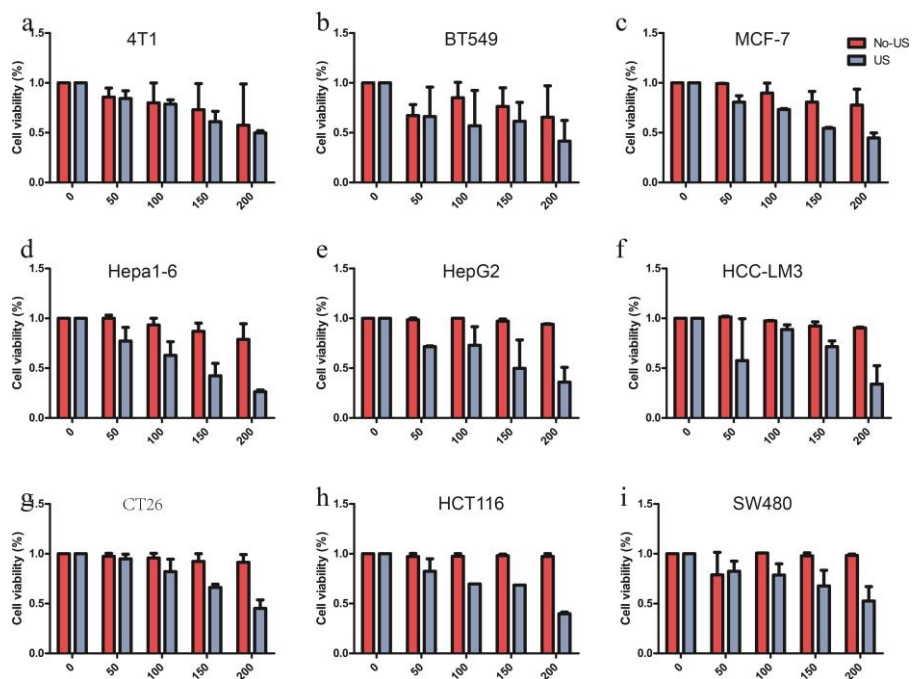

**Figure S6** SDT-mediated inhibition of cell viability. The cell viability of BC, HCC and CRC were measured by Cell Counting Kit-8. The relative cell viability in the drug administration by increasing concentration of CoWO<sub>4</sub>-PEG NPs (50, 100, 150, 200 µg/ml) was analyzed relatively to the untreated group (0 µg/mL). (a-c) Illustration to elucidate the decreasing cell viability of breast cancer cells, hepatocellular carcinoma cells and colorectal cancer cells treated by CoWO<sub>4</sub>-PEG NPs with or without US-activation.

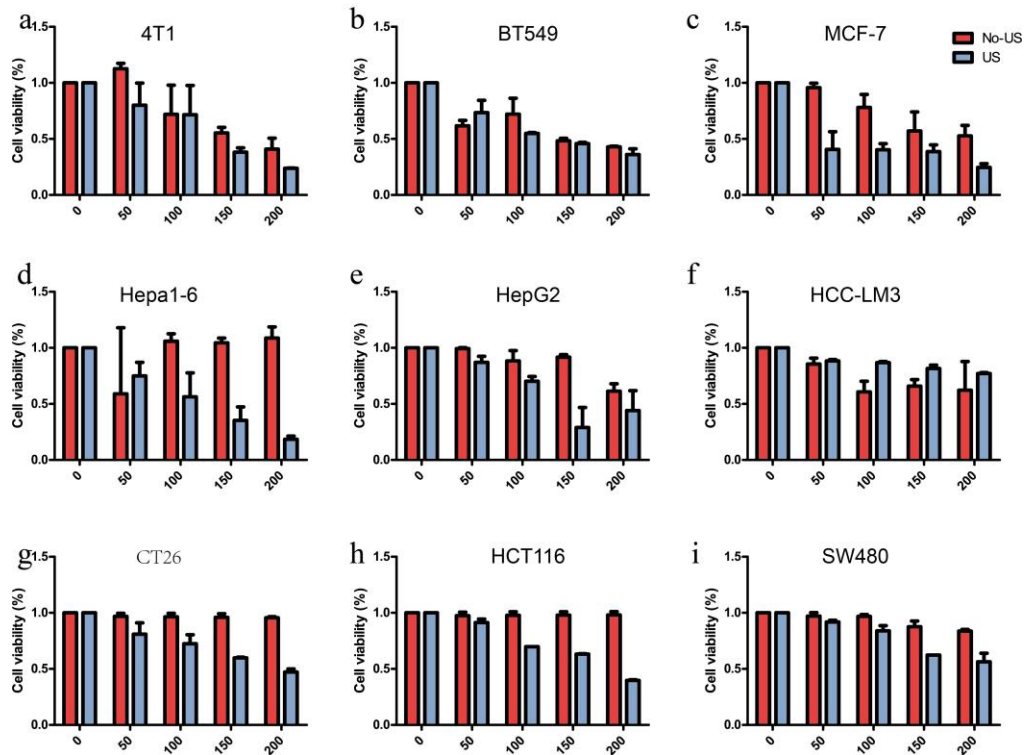

**Figure S7** SDT-mediated inhibition of cell viability. The cell viability of BC, HCC and CRC were measured by Cell Counting Kit-8. The relative cell viability in the drug administration by increasing concentration of FeWO<sub>4</sub>-PEG NPs (50, 100, 150, 200 µg/ml) was analyzed relatively to the untreated group (0 µg/mL). (a-c) Illustration to elucidate the decreasing cell viability of breast cancer cells, hepatocellular carcinoma cells and colorectal cancer cells treated by FeWO<sub>4</sub>-PEG NPs with or without US-activation.

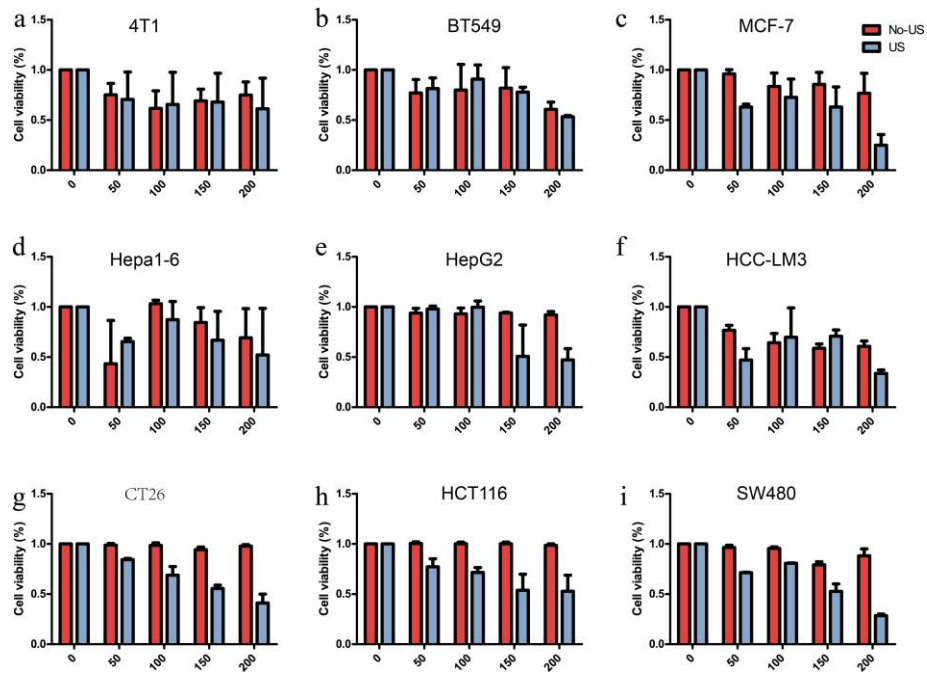

**Figure S8** SDT-mediated inhibition of cell viability. The cell viability of BC, HCC and CRC were measured by Cell Counting Kit-8. The relative cell viability in the drug administration by increasing concentration of MnWO<sub>4</sub>-PEG NPs (50, 100, 150, 200 µg/ml) was analyzed relatively to the untreated group (0 µg/mL). (a-c) Illustration to elucidate the decreasing cell viability of breast cancer cells, hepatocellular carcinoma cells and colorectal cancer cells treated by MnWO<sub>4</sub>-PEG NPs with or without US-activation.

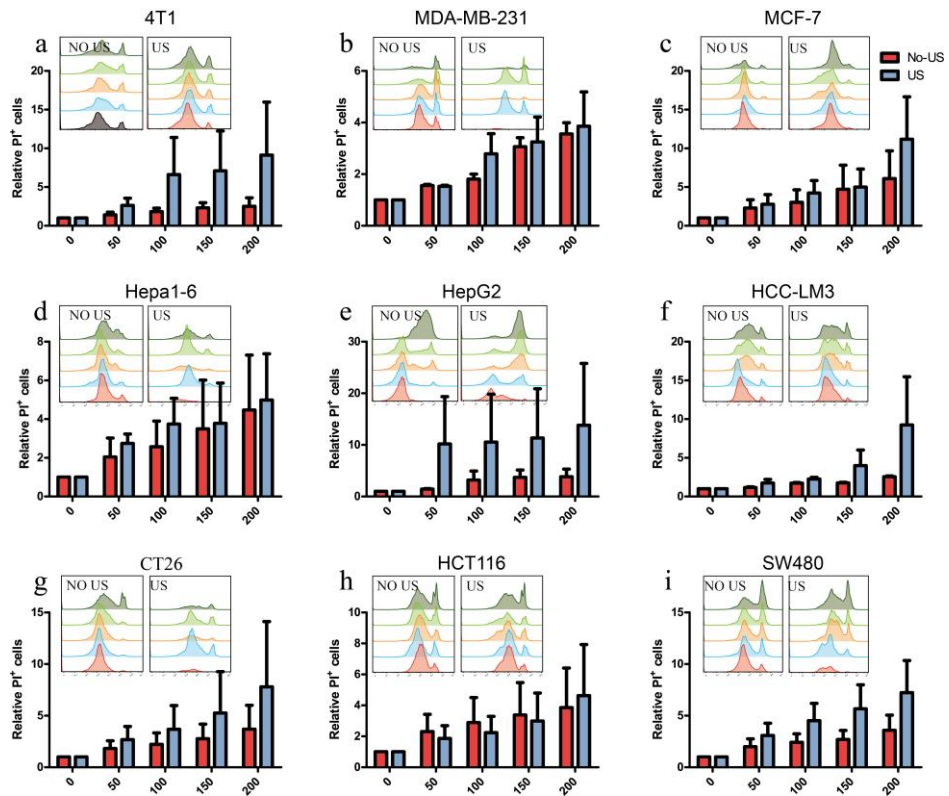

**Figure S9** SDT-mediated cytotoxicity in vitro. The propidium iodide (PI) was used to stain the NPs treated BC, HCC and CRC cells to indicate apoptosis cells. The percentage of PI<sup>+</sup> positive cells after the administration of CoWO<sub>4</sub>-PEG NPs with US activation was detected by flow cytometry. (a-c) The apoptosis rate of BC, HCC and CRC cells treated by CoWO<sub>4</sub>-PEG NPs with or without US-activation.



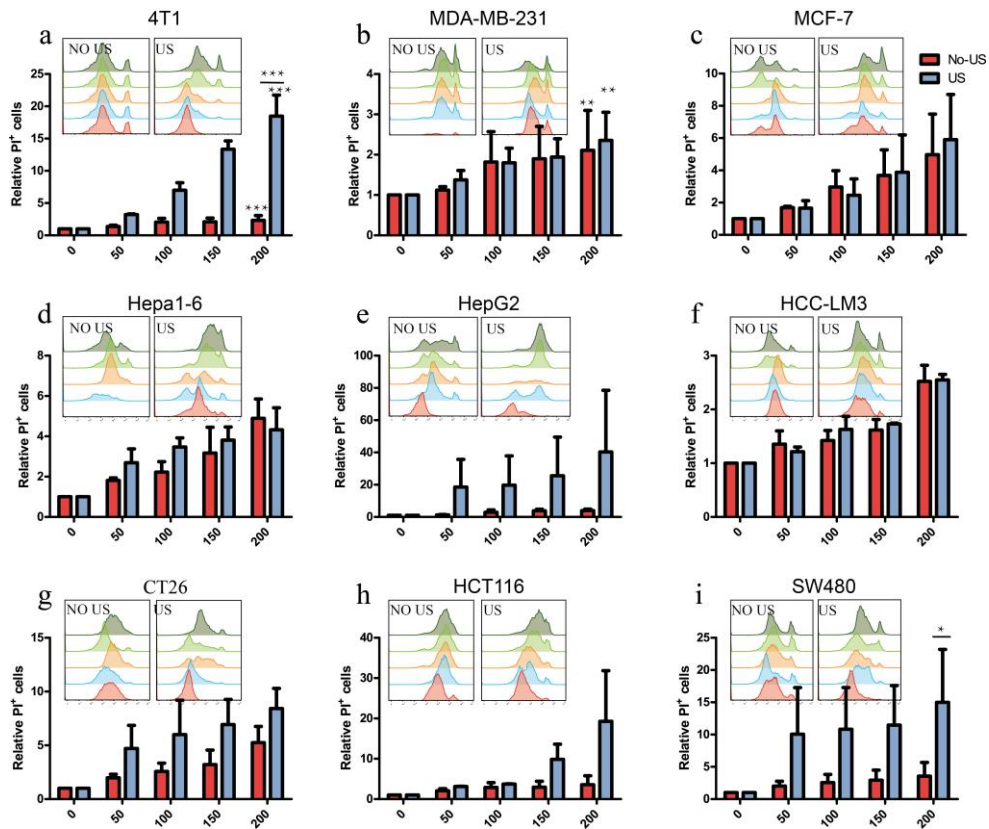

**Figure S10** SDT-mediated cytotoxicity in vitro. The propidium iodide (PI) was used to stain the NPs treated BC, HCC and CRC cells to indicate apoptosis cells. The percentage of PI<sup>+</sup> positive cells after the administration of FeWO<sub>4</sub>-PEG NPs with US activation was detected by flow cytometry. (a-c) The apoptosis rate of BC, HCC and CRC cells treated by FeWO<sub>4</sub>-PEG NPs with or without US-activation.

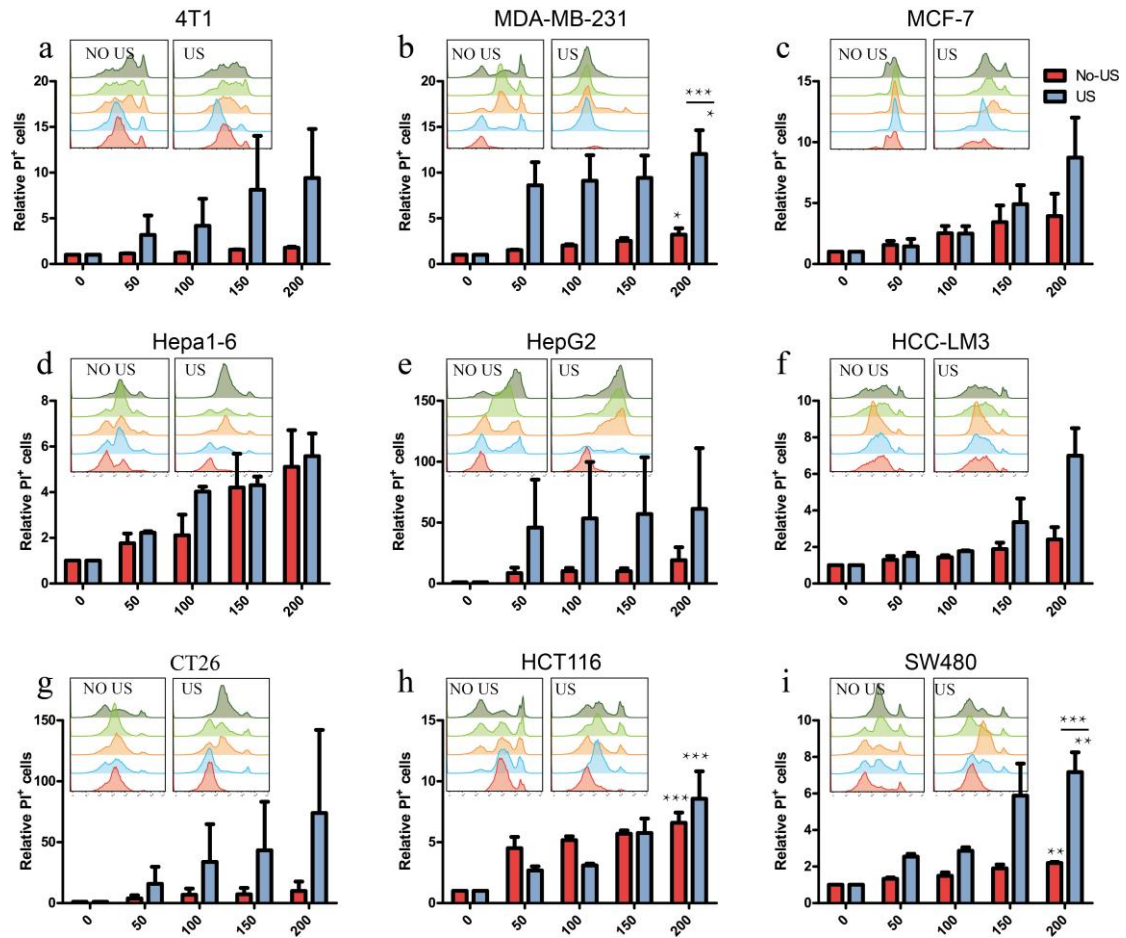

**Figure S11** SDT-mediated cytotoxicity in vitro. The propidium iodide (PI) was used to stain the NPs treated BC, HCC and CRC cells to indicate apoptosis cells. The percentage of PI<sup>+</sup> positive cells after the administration of MnWO<sub>4</sub>-PEG NPs with US activation was detected by flow cytometry. (a-c) The apoptosis rate of BC, HCC and CRC cells treated by MnWO<sub>4</sub>-PEG NPs with or without US-activation.

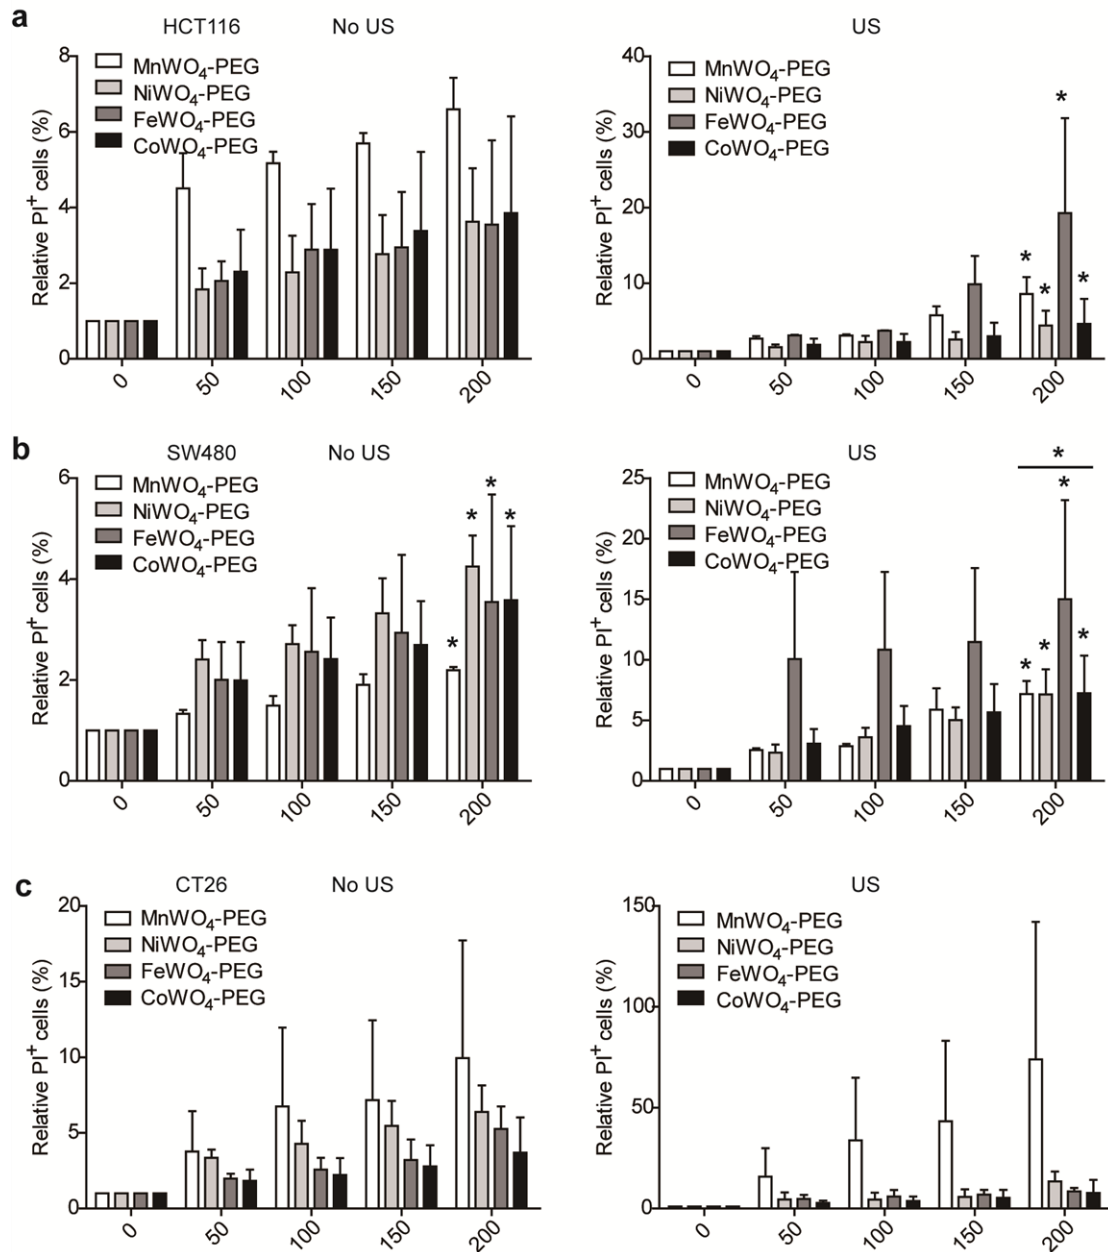

**Fig. S12 SDT-mediated cytotoxicity in CRC.** US triggered toxicity of MWO<sub>4</sub>-PEG NPs to cancers. The relative apoptosis rate of human BC HCT116 (a), SW480 (b) and mouse CRC CT26 (c) cells treated by increasing concentration (0, 50, 100, 150, 200 µg/ml) of four MWO<sub>4</sub>-PEG NPs (left figure) or without (right figure) US irradiation. The propidium iodide (PI) was used to stain the NPs treated CRC cells to indicate apoptosis cells. The percentage of PI<sup>+</sup> cells was detected by flow cytometry. Data shown are representative of 3 independent experiments. Data are represented as mean ± SD. \*,\*\* and \*\*\* represent p < 0.05, p < 0.01 and p < 0.001, respectively.

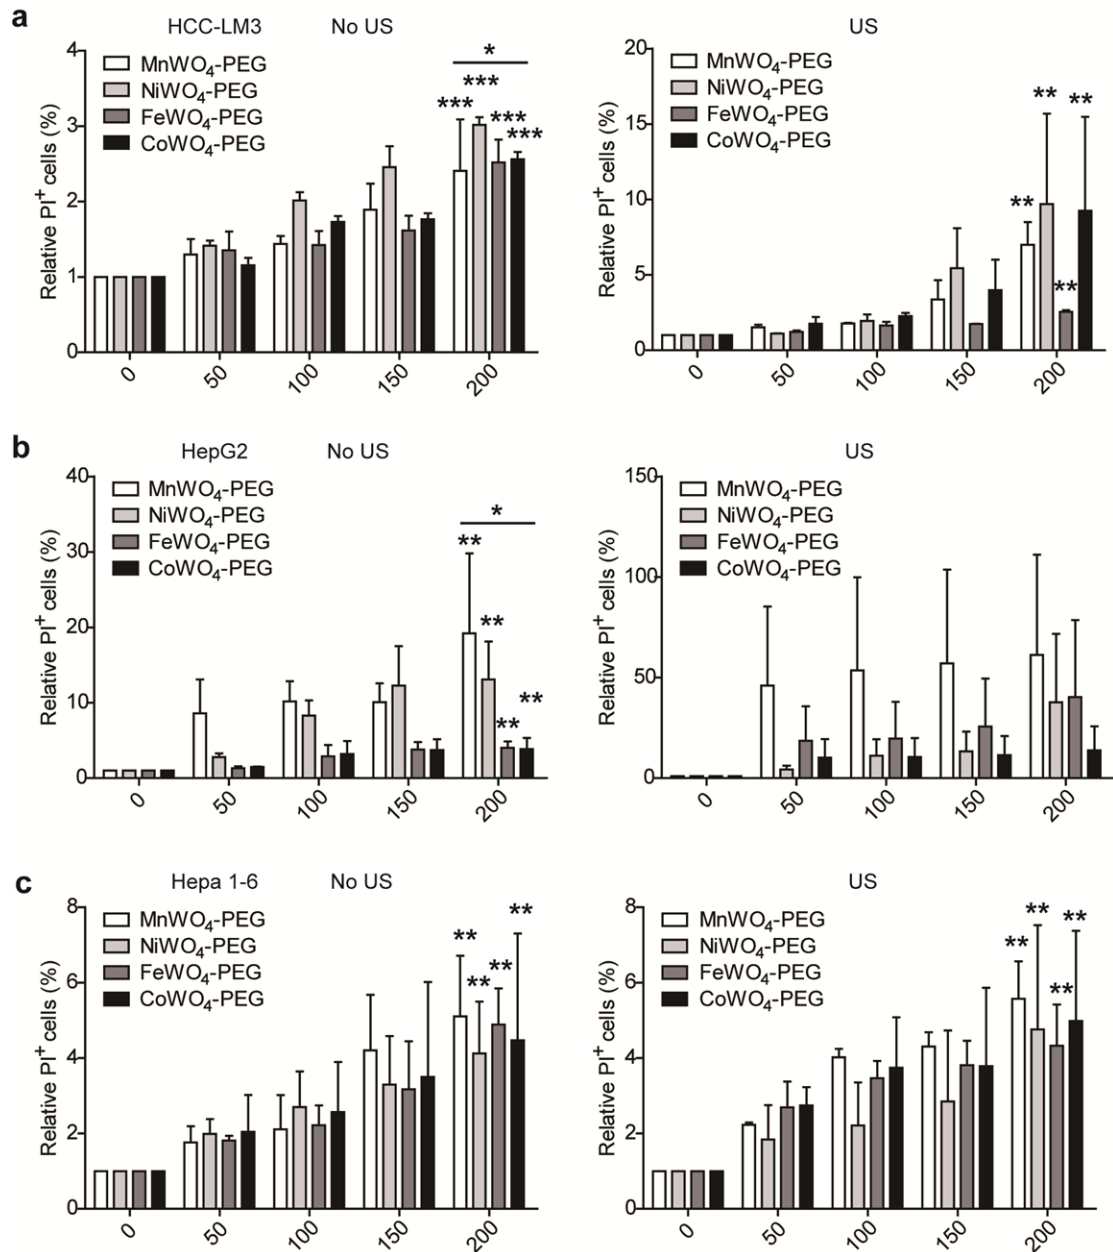

**Fig. S13 SDT-mediated cytotoxicity in HCC.** US triggered toxicity of MWO<sub>4</sub>-PEG NPs to cancers. The relative apoptosis rate of human HCC HCC-LM3 (a), HepG2 (b) and mouse HCC Hepa 1-6 (c) cells treated by increasing concentration (0, 50, 100, 150, 200 µg/ml) of four MWO<sub>4</sub>-PEG NPs (left figure) or without (right figure) US irradiation. The propidium iodide (PI) was used to stain the NPs treated HCC cells to indicate apoptosis cells. The percentage of PI<sup>+</sup> cells was detected by flow cytometry. Data shown are representative of 3 independent experiments. Data are represented as mean ± SD. \*,\*\* and \*\*\* represent p < 0.05, p < 0.01 and p < 0.001, respectively.
